# Supplementary material for: Piacentinu Ennese PDO Cheese as Reservoir of Promising Probiotic Bacteria
Source: PubMed Central journal article supplement (PMC6723934; doi:10.3390/microorganisms7080254), 2019-08-12
Supplement: microorganisms-07-00254-s001.pdf [file microorganisms-07-00254-s001.pdf]

**Table S1.** PCR primers used in quantitative Real-Time PCR assay

| Gene  | Forward Primer          | Reverse Primer         |
|-------|-------------------------|------------------------|
| COX-1 | CTCCGGTTCTTGCTGTTCT     | GTCACACTGGTAGCGGTCAA   |
| COX-2 | CAAATTGCTGGCAGGGTTGC    | AGGGCTTCAGCATAAAGCGT   |
| GAPDH | AGACACCATGGGGAAGGTGA    | TGGAATTTGCCATGGGTGGA   |
| IL-8  | TTTTGCCAAGGAGTGCTAAAGA  | AACCCTCTGCACCCAGTTTTTC |
| IL-10 | GACTTTAAGGGTTACCTGGGTTG | TCACATGCGCCTTGATGTCTG  |

**Table S2.** Antibiotic susceptibility measured by Etest method and expressed as percentage (%)

| Species                      | % | AMP | VA | GEN | KAN  | STRE | ERY | CLIN | TC  | CAP |
|------------------------------|---|-----|----|-----|------|------|-----|------|-----|-----|
| <i>L. plantarum</i> (n=30)   | R | 0   | nr | 0   | 0    | nr   | 0   | 0    | 0   | 0   |
|                              | S | 100 | nr | 100 | 100  | nr   | 100 | 100  | 100 | 100 |
| <i>P. pentosaceus</i> (n=27) | R | 0   | nr | 0   | 0    | 18.5 | 0   | 0    | 0   | 0   |
|                              | S | 100 | nr | 100 | 100  | 81.5 | 100 | 100  | 100 | 100 |
| <i>L. rhamnosus</i> (n=19)   | R | 0   | nr | 0   | 0    | 0    | 0   | 0    | 0   | 0   |
|                              | S | 100 | nr | 100 | 100  | 100  | 100 | 100  | 100 | 100 |
| <i>L. pentosus</i> (n=17)    | R | 0   | nr | 0   | 0    | nr   | 0   | 0    | 0   | 0   |
|                              | S | 100 | nr | 100 | 100  | nr   | 100 | 100  | 100 | 100 |
| <i>L. paracasei</i> (n=15)   | R | 0   | nr | 0   | 0    | 0    | 0   | 0    | 0   | 0   |
|                              | S | 100 | nr | 100 | 100  | 100  | 100 | 100  | 100 | 100 |
| <i>Leuc. lactis</i> (n=4)    | R | 0   | nr | 0   | 50   | 0    | 0   | 0    | 0   | 0   |
|                              | S | 100 | nr | 100 | 50   | 100  | 100 | 100  | 100 | 100 |
| % of resistance (R)          |   | 0   | nr | 0   | 1.8  | 4.5  | 0   | 0    | 0   | 0   |
| % of susceptibility (S)      |   | 100 | nr | 100 | 98.2 | 95.5 | 100 | 100  | 100 | 100 |

Legend: R (resistant), S (susceptible), nr (not required) according to EFSA 2012.

AMP, ampicillin; VA, vancomycin; GEN, gentamycin; KAN, kanamycin; STRE, streptomycin; EY, erythromycin; CLIN, clindamycin; TC, tetracycline; CAP, chloramphenicol.

**Table S3.** Virulence factors genes and antibiotic resistance related genes.

| Target genes                  | Tested strains |      |      |      |      |      |
|-------------------------------|----------------|------|------|------|------|------|
|                               | PE24           | PE25 | PE44 | PE61 | PE85 | PE86 |
| <i>gelE</i>                   | -              | -    | -    | -    | -    | -    |
| <i>hyl</i>                    | -              | -    | -    | -    | -    | -    |
| <i>asa1</i>                   | -              | -    | -    | -    | -    | -    |
| <i>esp</i>                    | -              | -    | -    | -    | -    | -    |
| <i>cylA</i>                   | -              | -    | -    | -    | -    | -    |
| <i>efaA</i>                   | -              | -    | -    | -    | -    | -    |
| <i>ace</i>                    | -              | -    | -    | -    | -    | -    |
| <i>ermA</i>                   | -              | -    | -    | -    | -    | -    |
| <i>ermB</i>                   | -              | -    | -    | -    | -    | -    |
| <i>ermC</i>                   | -              | -    | -    | -    | -    | -    |
| <i>tetK</i>                   | -              | -    | -    | -    | -    | -    |
| <i>tetL</i>                   | -              | -    | -    | -    | -    | -    |
| <i>tetM,</i>                  | -              | -    | -    | -    | -    | -    |
| <i>tetO</i>                   | -              | -    | -    | -    | -    | -    |
| <i>tetS</i>                   | -              | -    | -    | -    | -    | -    |
| <i>aac(6')-Ie-aph(2'')-Ia</i> | -              | -    | -    | -    | -    | -    |
| <i>catA</i>                   | -              | -    | -    | -    | -    | -    |
| <i>aph(3')-IIIa</i>           | -              | -    | -    | -    | -    | -    |
| <i>ant(4')-Ia</i>             | -              | -    | -    | -    | -    | -    |
| <i>aph(2'')-Id</i>            | -              | -    | -    | -    | -    | -    |
| <i>aph(2'')-Ic</i>            | -              | -    | -    | -    | -    | -    |
| <i>aph(2'')-Ib</i>            | -              | -    | -    | -    | -    | -    |
| <i>ant(6)-Ia</i>              | -              | -    | -    | -    | -    | -    |

(+) presence, (-) absence of virulence factors genes and antibiotic resistance related genes.

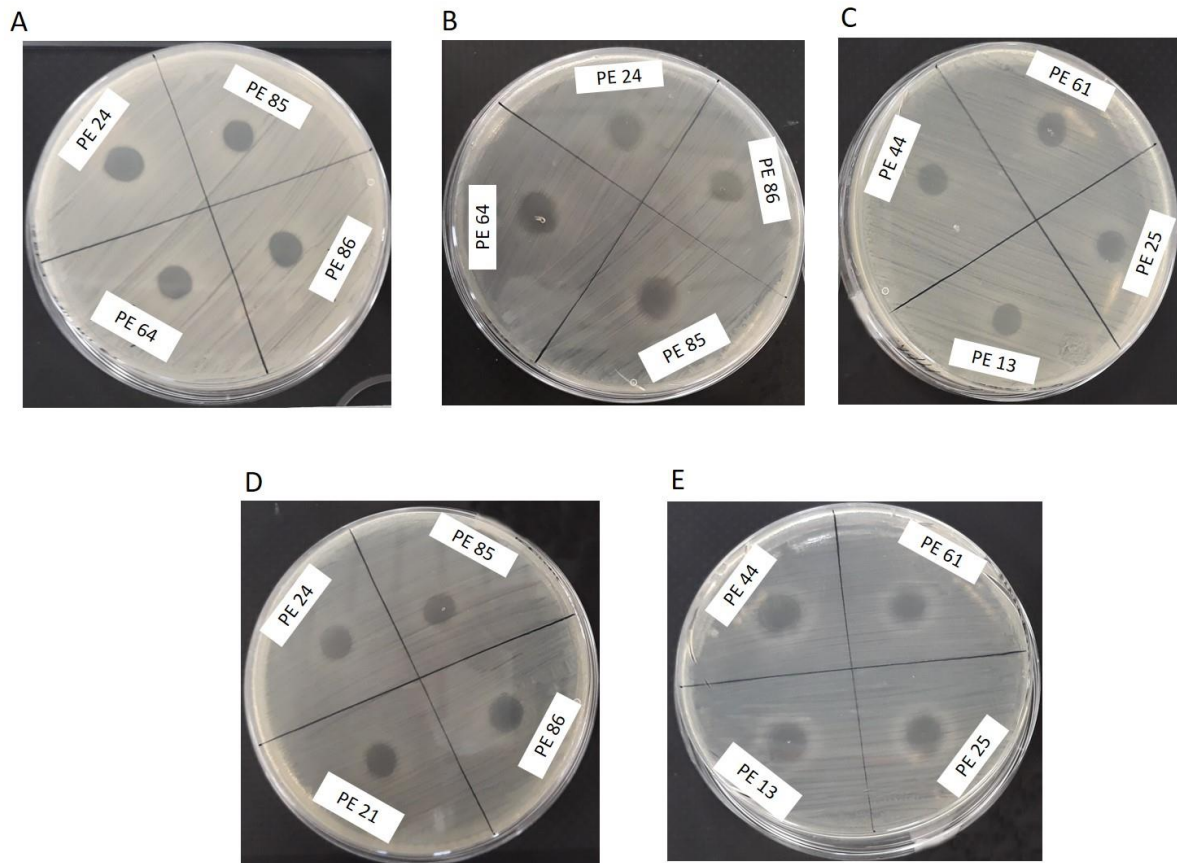

**Figure S1.** Antagonistic activity of some LAB isolates against *Escherichia coli* ATCC 25922 (A and E panels), *Salmonella enterica* serovar *typhimurium* ATCC 14028 (panel B), *Staphylococcus aureus* ATCC 6538 (panel C), and *Listeria monocytogenes* DSM 12464 (panel D).

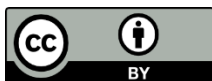

© 2019 by the authors. Licensee MDPI, Basel, Switzerland. This article is an open access article distributed under the terms and conditions of the Creative Commons Attribution (CC BY) license (<http://creativecommons.org/licenses/by/4.0/>).
